# Supplementary material for: Water, Sanitation and Hygiene in Schools in Low- and Middle-Income Countries: A Systematic Review and Implications for the COVID-19 Pandemic
Source: MDPI journal article supplement (doi:10.3390/ijerph19053124), 2022-03-07
Supplement: s1 [file s1]

# Water, sanitation and hygiene in schools in low- and middle-income countries and its implications for COVID-19 pandemic: A systematic review

Kasandra I.H.M Poague, Justine Blanford and Carmen Anthonj

## Supplementary Material S1: Search Strategy:

|                                                                        |                                                                                                                                                                                                                                                                                                                                                                                                                                                                                                                                                                                                                                                                     |
|------------------------------------------------------------------------|---------------------------------------------------------------------------------------------------------------------------------------------------------------------------------------------------------------------------------------------------------------------------------------------------------------------------------------------------------------------------------------------------------------------------------------------------------------------------------------------------------------------------------------------------------------------------------------------------------------------------------------------------------------------|
|                                                                        | <b>Search terms (PubMed, Web of Science, Scopus and <i>Literatura Latino-Americana e do Caribe em Ciências da Saúde</i> - LILACS)</b>                                                                                                                                                                                                                                                                                                                                                                                                                                                                                                                               |
| <b>Concept 1:</b> Water; sanitation and hygiene<br>*means truncation   | Hygiene; Hand disinfection; Handwashing; Hand washing; Hand-washing; Toilet*; Bathroom*; Latrine; Sewage; Waste water; Waste-water; Wastewater; Septic Tank; Sanitation; Water; Drinking-water; WASH; Menstruation; Menstrual;                                                                                                                                                                                                                                                                                                                                                                                                                                      |
| <b>Concept 2:</b> Schools and students<br>*means truncation            | School*; Pre-School*; Preschool*; Student*; Schoolchild*; School child; School age; School-age;                                                                                                                                                                                                                                                                                                                                                                                                                                                                                                                                                                     |
| <b>Concept 3:</b> Low-and middle-income countries<br>*means truncation | Developing countries; Third world countr*; Third-word countr*; Less developed countr*; Less-Developed countr*; Low-income countr*; Low income countr*; Middle-income countr*; Middle income countr*; LMIC*;                                                                                                                                                                                                                                                                                                                                                                                                                                                         |
| <b>Mesh Terms</b>                                                      | Hand hygiene; Hand disinfection; Toilet facilities; Bathroom equipment; Sewage; Drinking water; Water supply; Menstruation; Menstrual hygiene products; Schools; Students; Developing countries;                                                                                                                                                                                                                                                                                                                                                                                                                                                                    |
| <b>DeCs Terms</b>                                                      | Higiene das mãos/Hand hygiene/Higiene de las manos; Desinfecção das mãos/Hand disinfection/ Desinfección de las manos; Toaletes/Toilet facilities/Cuartos de baños; Aparelho sanitário/Bathroom equipments/Aparatos sanitários; Esgoto/Sewage/Agua del acantarillado; Abastecimento de água/Water supply/Abastecimiento de agua; Água potável/Drinking water/Agua potable; Produtos de higiene menstrual/Menstrual hygiene products/Productos para la higiene menstrual; Menstruação/Menstruation/ Menstruación; Acadêmicas/Schools/Instituciones académicas; Estudantes/Students/Estudiantes; Países em desenvolvimento/Developing countries/Países em desarrollo; |
|                                                                        | <b>Search terms (African Journals Online – AJOL)</b>                                                                                                                                                                                                                                                                                                                                                                                                                                                                                                                                                                                                                |
| <b>Concept 1:</b> Water; sanitation and hygiene                        | Hygiene; Water; Sanitation; Menstruation; Toilet; Bathroom; Sewage; Latrine;                                                                                                                                                                                                                                                                                                                                                                                                                                                                                                                                                                                        |
| <b>Concept 2:</b> Schools and students                                 | School; Student;                                                                                                                                                                                                                                                                                                                                                                                                                                                                                                                                                                                                                                                    |
| <b>Concept 3:</b> Low-and middle-income countries                      | LMIC; Developing countries;                                                                                                                                                                                                                                                                                                                                                                                                                                                                                                                                                                                                                                         |
