# Supplementary material for: Water, Sanitation and Hygiene in Schools in Low- and Middle-Income Countries: A Systematic Review and Implications for the COVID-19 Pandemic
Source: Int J Environ Res Public Health. 2022 Mar 7;19(5):3124. doi: 10.3390/ijerph19053124 (PMC8910349; doi:10.3390/ijerph19053124)
Supplement: Supplementary file 1 [file ijerph-19-03124-s001.zip]

Archive with 7 entries (7 files):
- Supplementary Material S1_Search Strategy.pdf
- Supplementary Material S2_Quality Assessment.xlsx
- Supplementary Material S3_Description of studies and schools.xlsx
- Supplementary Material S4_Description of water conditions in schools..xlsx
- Supplementary Material S5_Description of sanitation conditions in schools.xlsx
- Supplementary Material S6_Description of hygiene facilities in schools.xlsx
- Supplementary Material S7_Description of menstrual hygiene management conditions in schools.xlsx
