# Supplementary material for: Water, Sanitation and Hygiene in Schools in Low- and Middle-Income Countries: A Systematic Review and Implications for the COVID-19 Pandemic
Source: Int J Environ Res Public Health. 2022 Mar 7;19(5):3124. doi: 10.3390/ijerph19053124 (PMC8910349; doi:10.3390/ijerph19053124)
Supplement: Supplementary file 1 [file ijerph-19-03124-s001.zip › Supplementary Material S2_Quality Assessment.xlsx]

## Sheet: MMAT
Qualitative studies
Authors	Are there clear research questions?	Do the collected data allow to address the research questions?	Is the qualitative approach appropriate to answer the research question?	Are the qualitative data collection methods adequate to address the research question?	Are the findings adequately derived from the data?	Is the interpretation of results sufficiently substantiated by data?	Is there coherence between qualitative data sources, collection, analysis and interpretation?	Ranking (%)
Babalobi, 2013	Yes	Yes	Yes	Yes	Yes	Yes	Yes	100
Chinyama et al., 2019	Yes	Yes	Yes	Yes	Yes	Yes	Yes	100
Connoly and Sommer, 2013	Yes	Yes	Yes	Yes	Yes	Yes	Yes	100
Crofts and Fisher, 2012	Yes	Yes	Yes	Yes	Yes	Yes	Yes	100
Devkota et al., 2020	Yes	Yes	Yes	Yes	Yes	Yes	Yes	100
Erhard et al., 2013	Yes	Yes	Yes	Yes	Yes	Yes	No	80
Jahan et al., 2020	Yes	Yes	Yes	Yes	Yes	Yes	Yes	100
Lang, 2012	Yes	Yes	Yes	No	No	No	No	20
Mbatha, 2011	Yes	Yes	Yes	Yes	Yes	Yes	Yes	100
Parker et al., 2014	Yes	Yes	Yes	Yes	No	Yes	No	60
Sommer et al., 2015	Yes	Yes	Yes	Yes	Yes	Yes	No	80
Sommer, 2013	Yes	Yes	Yes	Yes	Yes	Yes	No	80
Uduku, 2015	Yes	Yes	Yes	Can't tell	Can't tell	Can't tell	Can't tell	20
Zaunda et al., 2018	Yes	Yes	Yes	Yes	Yes	Yes	Yes	100
Quantitative randomized controlled trials
Authors	Are there clear research questions?	Do the collected data allow to address the research questions?	Is randomization appropriately performed?	Are the groups comparable at baseline?	Are there complete outcome data?	Are outcome assessors blinded to the intervention provided?	Did the participants adhere to the assigned intervention?	Ranking %
Bowen et al., 2007	Yes	Yes	Can't tell	Cant' tell	Yes	No	Yes	40
Freeman et al., 2014	Yes	Yes	Yes	No	No	Can't tell	No	20
Mathew et al., 2009	Yes	Yes	Can't tell	Can't tell	Can't tell	Yes	Can't tell	20
Wichaidit et al., 2019	Yes	Yes	Yes	Can't tell	No	No	Yes	40
Quantitative non-randomized studies
Authors	Are there clear research questions?	Do the collected data allow to address the research questions?	Are the participants representative of the target population?	Are measurements appropriate regarding both the outcome and intervention (or exposure)?	Are there complete outcome data?	Are the confounders accounted for in the design and analysis?	During the study period, is the intervention administered (or exposure occurred) as intended?	Ranking %
Aschale et al., 2021	Yes	Yes	Yes	Yes	Yes	Yes	Yes	100
Alam et al., 2017	Yes	Yes	Yes	Yes	Yes	Yes	Yes	100
Assefa e Kumie, 2014	Yes	Yes	Yes	Yes	Yes	Yes	Yes	100
Bergenfeld, Jackson and Yount, 2021	Yes	Yes	Can't tell	Yes	Can't tell	Yes	Yes	80
Bulto, 2021	Yes	Yes	Yes	Yes	Yes	Yes	Yes	100
Grant, Lloyd and Mensch, 2013	Yes	Yes	Yes	Yes	Yes	Yes	Yes	100
Grimes et al., 2017	Yes	Yes	Can't tell	No	Yes	No	Yes	40
Korir, Okwara and Okumbe, 2018	Yes	Yes	Can't tell	Yes	Yes	Yes	Yes	80
Lopez-Quintero, Freeman and Neumark, 2009	Yes	Yes	Yes	No	Yes	Yes	Yes	80
Montgomery et al., 2016	Yes	Yes	Yes	Yes	No	No	No	40
Sangalang et al., 2020	Yes	Yes	Yes	No	Yes	No	Yes	60
Shehmolo et al., 2021	Yes	Yes	Yes	Yes	Yes	Yes	Yes	100
Vally et al., 2019	Yes	Yes	No	Yes	No	Yes	Yes	60
Quantitative descriptive studies
Authors	Are there clear research questions?	Do the collected data allow to address the research questions?	Is the sampling strategy relevant to address the research question?	Is the sample representative of the target population?	Are the measurements appropriate?	Is the risk of nonresponse bias low?	Is the statistical analysis appropriate to answer the research question?	Ranking %
Agol e Harvey, 2018	Yes	Yes	Yes	Yes	Yes	Can't tell	No	60
Ahmed et al., 2020	Yes	Yes	Yes	Yes	Yes	Yes	Yes	100
Alexander et al., 2014	Yes	Yes	Yes	Yes	Yes	Yes	Yes	100
Antwi-Agyei et al., 2017	Yes	Yes	Yes	Yes	Yes	Yes	Yes	100
Chung et ak., 2009	Yes	Yes	Can't tell	Can't tell	Yes	Yes	Yes	60
Cronk et al., 2021	Yes	Yes	Yes	Yes	Yes	Yes	Yes	100
Degefu Birhane,Serbessa and Degfie, 2019	Yes	Yes	Yes	Yes	Can't tell	Yes	Yes	80
Ebong, 1994	Yes	Yes	Yes	Can't tell	Yes	No	Yes	60
Egbinola and Amanambu, 2015	Yes	Yes	Yes	Yes	Yes	Can't tell	Yes	80
Ekpo et al., 2008	Yes	Yes	Yes	Yes	Can't tell	Yes	Yes	80
Ezeonu and Anyansi, 2010	Yes	Yes	Yes	Yes	Yes	Yes	Yes	100
Hassen and Abera, 2015	Yes	Yes	Yes	Yes	Can't tell	Yes	Yes	80
Jordanova et al., 2015	Yes	Yes	Yes	Yes	No	No	Yes	60
Karon et al., 2017	Yes	Yes	Yes	Yes	Yes	Yes	Yes	100
Majra and Gur, 2010	Yes	Yes	Yes	Yes	Can't tell	Yes	Yes	80
Mogaji et al., 2016	Yes	Yes	Yes	Yes	Yes	Yes	Yes	100
Morgan et al., 2017	Yes	Yes	Yes	Yes	Can't tell	Yes	Yes	80
Mwanri, Worsley and Masika, 2000	Yes	Yes	No	No	Yes	Can't tell	Yes	40
Nazliansyah, Wichaikull and Wetasin, 2016	Yes	Yes	Yes	Yes	Can't tell	Can't tell	No	60
Ngwenya et al., 2018	Yes	Yes	Yes	Yes	Yes	Yes	Yes	100
Ofovwe and Ofili, 2009	Yes	Yes	Yes	Yes	Yes	Yes	Yes	100
Rai et al., 2017	Yes	Yes	Yes	Yes	Can't tell	Yes	Yes	80
Saboori et al., 2011	Yes	Yes	Yes	Yes	Yes	Yes	Yes	100
Shrestha et al., 2017	Yes	Yes	Yes	Yes	Yes	No	Yes	80
Sibiya and Gumbo, 2013	Yes	Yes	Yes	Yes	Can't tell	Cant' tell	Yes	60
Mixed methods studies
Authors	Are there clear research questions?	Do the collected data allow to address the research questions?	Is there an adequate rationale for using a mixed methods design to address the research question?	Are the different components of the study effectively integrated to answer the research question?	Are the outputs of the integration of qualitative and quantitative components adequately interpreted?	Are divergences and inconsistencies between quantitative and qualitative results adequately addressed?	Do the different components of the study adhere to the quality criteria of each tradition of the methods involved?	Ranking %
Boosey, Prestwich and Deave, 2014	Yes	Yes	Yes	Yes	Yes	Yes	Yes	100
Chatterley, Liden and Javernick-Will, 2013	Yes	Yes	Yes	Yes	Yes	Yes	Yes	100
Chatterley et al.,2014	Yes	Yes	Yes	Yes	Yes	Yes	Yes	100
Dube and January, 2012	Yes	Yes	Yes	Yes	Yes	Yes	Yes	100
Miiro et al., 2018	Yes	Yes	Yes	Yes	Yes	Yes	Yes	100
Mirassou-Wolf et al., 2017	Yes	Yes	Yes	Yes	Yes	Yes	Yes	100
Mohammed and Larsen-Reindor, 2020	Yes	Yes	Yes	Yes	Yes	Yes	Yes	100
Shallo, Willi and Abubeker, 2020	Yes	Yes	Yes	Yes	Yes	Yes	Yes	100
Xuan et al., 2012	Yes	Yes	Yes	Yes	Yes	Yes	No	100
