# Supplementary material for: Water, Sanitation and Hygiene in Schools in Low- and Middle-Income Countries: A Systematic Review and Implications for the COVID-19 Pandemic
Source: Int J Environ Res Public Health. 2022 Mar 7;19(5):3124. doi: 10.3390/ijerph19053124 (PMC8910349; doi:10.3390/ijerph19053124)
Supplement: Supplementary file 1 [file ijerph-19-03124-s001.zip › Supplementary Material S3_Description of studies and schools.xlsx]

## Sheet: S3
Authors	Year of Publication	Year of data collection	Country	Type of school	Number of schools	Number of school per locality (rural vs urban)	Number of school per management model (public vs private)
Agol and Harvey, 2018	2018	2012	Zambia	-	10000	-	-
Ahmed et al., 2020	2020	-	Pakistan	Primary	425	-	-
Alam et al., 2017	2017	2013	Bangladesh	Primary and secondary	700	-	466; 234
Alexander et al., 2014	2014	2012	Kenya	Primary	62	62; 0	-
Antwi-Agyei et al., 2017	2017	2014	Tanzania	Primary	70	-	-
Aschale et al., 2021	2021	2018	Ethiopia	Primary	5	0; 5	3; 2
Assefa and Kumie, 2014	2014	2012-13	Ethiopia	Primary	5	-	-
Babalobi, 2013	2013	-	Nigeria	Primary	4	0; 4	0; 4
Bergenfeld, Jackson and Yount, 2021	2021	2018	Nepal	Secondary	159	49; 110	99; 60
Boosey, Prestwich and Deave, 2014	2014	2013	Uganda	Primary	6	6; 0	6; 0
Bowen et al., 2007	2007	-	China	Primary	87	-	87; 0
Bulto, 2021	2021	2019	Ethiopia	Preparatory and high schools	3	-	-
Chatterley, Liden and Javernick-Will, 2013	2013	-	Belize	Primary	15	13; 2	-
Chatterley et al.,2014	2014	2021	Bangladesh	Primary	16	16;0	8; 8
Chinyama et al., 2019	2019	2015	Zambia	Primary and secondary	6	6;0	-
Chung et al., 2009	2009	-	Taiwan	Above senior high school level and schools under junior high school level	42	21;21	-
Connoly and Sommer, 2013	2013	2010-11	Cambodia	Secondary	2	1;1	2; 0
Crofts and Fisher, 2012	2012	-	Uganda	Secondary	18	-	-
Cronk et al., 2021	2021	2017	Ethiopia, Ghana, Honduras, India, Kenya, Malawi, Mali, Mozambique, Niger, Rwanda, Tanzania, Uganda, Zambia, and Zimbabwe	Primary and secondary	2690	2690;0	-
Degefu Birhane,Serbessa and Degfie, 2019	2019	2016	Ethiopia	Junior	5	-	-
Devkota et al., 2020	2020	2020	Nepal	-	1	-	-
Dube and January, 2012	2012	-	Zimbabwe	Primary	4	-	-
Ebong, 1994	1994	1989	Nigeria	Secondary	1	-	-
Egbinola and Amanambu, 2015	2015		Nigeria	Secondary	44	0; 44	44; 0
Ekpo et al., 2008	2008	2004-05	Nigeria	Primary	3	1; 2	2; 1
Erhard et al., 2013	2013	2011	Uganda and Malawi	Primary	41	-	-
Ezeonu and Anyansi, 2010	2010	2007	Nigeria	Primary	31	-	16; 15
Freeman et al., 2014	2014	2007-08	Kenya	Primary	185	-	185; 0
Grant, Lloyd and Mensch, 2013	2013	2007	Malawi	Primary	59	59; 0	59; 0
Grimes et al., 2017	2017	2013	Ethiopia	Primary	30	-	30; 0
Hassen and Abera, 2015	2015	2010	Ethiopia	Primary and secondary	10	-	-
Jahan et al., 2020	2020	-	Bangladesh	-	8	4; 4	-
Jordanova et al., 2015	2015	2012	Nicaragua	Preeschool, primary, secondary, with all levels and unespecific schools	526	87; 415	-
Karon et al., 2017	2017	2015	Indonesia	Primary and combined primary and junior high school	75	75; 0	56; 19
Korir, Okwara and Okumbe, 2018	2018	2014-15	Kenya	Primary	10	10; 0	-
Lang, 2012	2012	2007-09	Ghana	Elementary	4	-	-
Lopez-Quintero, Freeman and Neumark, 2009	2009	-	Colombia	-	25	-	14; 11
Majra and Gur, 2010	2010		India	Primary, upper primary and from primary to high school level	20	20; 0	20; 0
Mathew et al., 2009	2009	2006-07	India	Upper primary	300	-	-
Mbatha, 2011	2011	2010-11	Swaziland	Primary	2	2; 0
Miiro et al., 2018	2018	2015-16	Uganda	Secondary	4	0; 4	2; 2
Mirassou-Wolf et al., 2017	2017		Cambodia	Primary and secondary	8	-	-
Mogaji et al., 2016	2016	2014	Nigeria	Primary	3	-	3; 0
Mohammed and Larsen-Reindor, 2020	2020	-	Ghana	Junior High	5	5; 0	-
Montgomery et al., 2016	2016	2012-14	Uganda	Primary	8	8; 0	-
Morgan et al., 2017	2017	-	Ethiopia, Kenya, Mozambique, Rwanda, Uganda, and Zambia	Primary, secondary and combined	2270	2270; 0	-
Mwanri, Worsley and Masika, 2000	2000	1999	Tanzania	-	76	-	-
Nazliansyah, Wichaikull and Wetasin, 2016	2016	-	Indonesia	Elementary	11	-	11; 0
Ngwenya et al., 2018	2018	2013	Botswana	Primary	3	2; 0	3; 0
Ofovwe and Ofili, 2009	2009	2004	Nigeria	Primary	133	-	29; 104
Parker et al., 2014	2014	2005-06	Uganda	Primary and secondary	14	-	-
Rai et al., 2017	2017	2011	Nepal	-	40	-	20; 20
Saboori et al., 2011	2011	2008	Kenya	Primary	55	-	-
Sangalang et al., 2020	2020	2017 - 18	Philippines	Primary and Secondary	15	15; 0	15; 0
Shallo, Willi and Abubeker, 2020	2020	2018	Ethiopia	High	5	-	4; 1
Shehmolo et al., 2021	2021	2018	Ethiopia	Primary	8	-	-
Shrestha et al., 2017	2017	2015	Nepal	Secondary or above	16	-	16; 0
Sibiya and Gumbo, 2013	2013	-	South Africa	Secondary	8	4; 4	-
Sommer et al., 2015	2015	2011	Ghana, Cambodia and Ethiopia	Secondary	6	-	-
Sommer, 2013	2013	2007	Tanzania	Primary, secondary and boarding	12	-	-
Uduku, 2015	2015	2007	Ghana and South Africa	Primary	2	1; 2	-
Vally et al., 2019	2019	2016-2017	Philippines	Elementary	8	-	8; 0
Wichaidit et al., 2019	2019	2015	Kenya	Primary	30	-	30; 0
Xuan et al., 2012	2012	2008	Vietnam	Primary and secondary	6	6; 0	6; 0
Zaunda et al., 2018	2018	2016	Malawi	Primary	10	-	7; 3
