# Supplementary material for: Water, Sanitation and Hygiene in Schools in Low- and Middle-Income Countries: A Systematic Review and Implications for the COVID-19 Pandemic
Source: Int J Environ Res Public Health. 2022 Mar 7;19(5):3124. doi: 10.3390/ijerph19053124 (PMC8910349; doi:10.3390/ijerph19053124)
Supplement: Supplementary file 1 [file ijerph-19-03124-s001.zip › Supplementary Material S4_Description of water conditions in schools..xlsx]

## Sheet: S4
Authors	Country	Schools with improved water source (n/%)	Schools with unimproved source or no water source (n/%)	Schools with unkown water source (n/%)	Reported water shortage	Reported maintanence problems
Agol and Harvey, 2018	Zambia	6700 (67%)	3300 (33%)	-	X	-
Ahmed et al., 2020	Pakistan	358 (84.2%)	67 (15.8%)	-	X	-
Alam et al., 2017	Bangladesh	-	-	-	-	-
Alexander et al., 2014	Kenya	-	-	-	X	-
Antwi-Agyei et al., 2017	Tanzania	44 (63%)	19 (27%)	7 (10%)	X	-
Aschale et al., 2021	Ethiopia	-	-	5 (100%)	X	X
Assefa and Kumie, 2014	Ethiopia	-	-	5 100%)	-	-
Babalobi, 2013	Nigeria	4 (100%)	0 (0%)	-	X	-
Bergenfeld, Jackson and Yount, 2021	Nepal	-	-	-	X	-
Boosey, Prestwich and Deave, 2014	Uganda	3 (50%)	-	3 (50%)	X	X
Bowen et al., 2007	China	-	-	-	-	-
Bulto, 2021	Ethiopia	-	-	-	-	-
Chatterley, Liden and Javernick-Will, 2013	Belize	-	-	-	-	-
Chatterley et al.,2014	Bangladesh	-	-	-	-	-
Chinyama et al., 2019	Zambia	6 (100%)	0 (0%)	-	-	-
Chung et al., 2009	Zambia	19 (45%)	11 (26%)	12 (29%)	-	-
Connoly and Sommer, 2013	Cambodia	-	-	-	-	-
Crofts and Fisher, 2012	Uganda	-	-	18 (100%)	-	-
Cronk et al., 2021	Ethiopia, Ghana, Honduras, India, Kenya, Malawi, Mali, Mozambique, Niger, Rwanda, Tanzania, Uganda, Zambia, and Zimbabwe	2049 (76.5%)*	629 (23.5%)*	-	X	-
Degefu Birhane,Serbessa and Degfie, 2019	Ethiopia	-	-	-	X	-
Devkota et al., 2020	Nepal	-	-	-	-	-
Dube and January, 2012	Zimbabwe	4 (100%)	0 (0%)	-	X	-
Ebong, 1994	Nigeria	0 (0%)	1 (100%)	-	X	-
Egbinola and Amanambu, 2015	Nigeria	5 (11.4%)	2 (4.5%)	37 (84.1%)	X	X
Ekpo et al., 2008	Nigeria	3 (100%)	0 (0%)	-	X	-
Erhard et al., 2013	Uganda and Malawi	-	-	41 (100%)	-	-
Ezeonu and Anyansi, 2010	Nigeria	19 (61.3%)	3 (9.7%)	9 (29%)	-	-
Freeman et al., 2014	Kenya	75 (40.5%) before intervention; 128 (69.2%) after intervention. In the dry season 46 (24.9%) before intervention; 66 (35.7%) after intervention	110 (59.5%) before intervention; 57 (30.8%) after intervention. In the dry season 139 (75.1%); 119 (64.3%) after intervention	-	X	-
Grant, Lloyd and Mensch, 2013	Malawi	-	-	59 (100%)	-	-
Grimes et al., 2017	Ethiopia	-	-	-	-	-
Hassen and Abera, 2015	Ethiopia	10 (100%)	0 (0%)		-	-
Jahan et al., 2020	Bangladesh	-	-	-	X	-
Jordanova et al., 2015	Nicaragua	-	173 (38%)*	283 (62%)*	X	X
Karon et al., 2017	Indonesia	53 (71%)	22 (29%)		X	-
Korir, Okwara and Okumbe, 2018	Kenya	-	-	-	-	-
Lang, 2012	Ghana	-	-	-	X	-
Lopez-Quintero, Freeman and Neumark, 2009	Colombia	-	-	-	X	-
Majra and Gur, 2010	India	-	-	-	-	-
Mathew et al., 2009	India	-	-	300 (100%)	X	-
Mbatha, 2011	Swaziland	1 (50%)	-	1 (50%)	X	X
Miiro et al., 2018	Uganda	-	-	-	X	-
Mirassou-Wolf et al., 2017	Cambodia	-	1 (12.5%)	7 (87.5%)	X	X
Mogaji et al., 2016	Nigeria	3 (100%)	0 (0%)	-	-	-
Mohammed and Larsen-Reindor, 2020	Ghana	-	-	-	X	-
Montgomery et al., 2016	Uganda	-	-	-	X	-
Morgan et al., 2017	Ethiopia, Kenya, Mozambique, Rwanda, Uganda, and Zambia	1746 (79.1%) primary source; 1475 (66.8%) secondary source*	462 (20.9%) primary source; 733 (33.2%) secondary source*	-	X	X
Mwanri, Worsley and Masika, 2000	Tanzania	-	-	-	X	-
Nazliansyah, Wichaikull and Wetasin, 2016	Indonesia	-	-	-	-	-
Ngwenya et al., 2018	Botswana	3 (100%)	0 (0%)	-	X	X
Ofovwe and Ofili, 2009	Nigeria	23 (17.3%)	-	110 (82.7%)	X	-
Parker et al., 2014	Uganda	-	-	-	-	-
Rai et al., 2017	Nepal	-	-	-	-	-
Saboori et al., 2011	Kenya	48 (88%) in the rainy season; 26 (47%) in the dry season	7 (12%) in the rainy season; 29 (53%) in the dry season	-	X	X
Sangalang et al., 2020	Philippines	-	-	-	X	-
Shallo, Willi and Abubeker, 2020	Ethiopia	-	-	-	-	-
Shehmolo et al., 2021	Ethiopia	2 (25%)	-	6 (75%)	X	-
Shrestha et al., 2017	Nepal	8 (50%)	2 (12.5%)	6 (27.5%)	X	-
Sibiya and Gumbo, 2013	South Africa	8 (100%)	0 (0%)	-	X	-
Sommer et al., 2015	Ghana, Cambodia and Ethiopia	-	-	-	X	-
Sommer, 2013	Tanzania	-	-	-	X	-
Uduku, 2015	Ghana and South Africa	2 (66%)	-	1 (33%)	-	X
Vally et al., 2019	Philippines	1 (12.5%)	-	7 (87.5%)	X	X
Wichaidit et al., 2019	Kenya	-	-	30 (100%)	X	X
Xuan et al., 2012	Vietnam	-	-	-	-	-
Zaunda et al., 2018	Malawi	3 (30%)	2 (20%)	5 (50%)	X	-
*The frequencies were not calculated based on the total number of schools, but rather on the number of schools that reply for the water source question on the survey. For more information see the papers.
When the study presented water sources in both rainy and dry season the latter one was considered.
