# Supplementary material for: Water, Sanitation and Hygiene in Schools in Low- and Middle-Income Countries: A Systematic Review and Implications for the COVID-19 Pandemic
Source: Int J Environ Res Public Health. 2022 Mar 7;19(5):3124. doi: 10.3390/ijerph19053124 (PMC8910349; doi:10.3390/ijerph19053124)
Supplement: Supplementary file 1 [file ijerph-19-03124-s001.zip › Supplementary Material S5_Description of sanitation conditions in schools.xlsx]

## Sheet: S5
Authors	Country	Schools with improved sanitation facilities (n/%)	Schools with unimproved or no sanitation facilities (n/%)	Schools with unknow sanitation facilities (n/%)	Students per sanitation facility ratio	Girls per sanitation facility ratio	Boys per sanitation facility ratio	Reported lack of cleanliness	Reported shared facilities between boys and girls	Reported shared facilities between students and teachers	Reported lack of doors	Reported lack of locks	Reported lack of roofs
Agol and Harvey, 2018	Zambia	-	5700 (57%)	4300 (43%)
Ahmed et al., 2020	Pakistan	-	-	-
Alam et al., 2017	Bangladesh	574 (82%)	126 (28%)	-		98**
Alexander et al., 2014	Kenya	-	-	62 (100%)	36**	37**	40**	X	X			X
Antwi-Agyei et al., 2017	Tanzania	68 (97%)	2 (3%)	-		48**	50**	X
Aschale et al., 2021	Ethiopia	-	-	5 (100%)		84	75	X
						78	38
						108	84
						29	28
						31	30
Assefa and Kumie, 2014	Ethiopia	-	-	5 (100%)		80**	73**	X
Babalobi, 2013	Nigeria	-	-	4 (100%)
Bergenfeld, Jackson and Yount, 2021	Nepal	-	-	-
Boosey, Prestwich and Deave, 2014	Uganda	-	-	6 (100%)				X		X	X	X
Bowen et al., 2007	China	-	-	87 (100%)	28**
Bulto, 2021	Ethiopia	-	-	-								X
Chatterley, Liden and Javernick-Will, 2013	Belize	14 (93.3%)	-	1 (6.7%)	22			X			X	X
					84
Chatterley et al.,2014	Bangladesh	-	-	-	18			X			X	X
					95
Chinyama et al., 2019	Zambia	-	-	6 (100%)	110						X	X
					145
Chung et al., 2009	Taiwan	-	-	-
Connoly and Sommer, 2013	Cambodia	-	-	-	125	170		X	X
					100
Crofts and Fisher, 2012	Uganda	-	-	-				X	X
Cronk et al., 2021	Ethiopia, Ghana, Honduras, India, Kenya, Malawi, Mali, Mozambique, Niger, Rwanda, Tanzania, Uganda, Zambia, and Zimbabwe	2311 (85.9%)	379 (14.1)	-
Degefu Birhane,Serbessa and Degfie, 2019	Ethiopia	-	-	-					X
Devkota et al., 2020	Nepal	-	-	-
Dube and January, 2012	Zimbabwe	4 (100%)	0 (0%)	-	36			X
Ebong, 1994	Nigeria	0 (0%)	1 (100%)	-
Egbinola and Amanambu, 2015	Nigeria	15 (34.1%)	1 (2.3%)	29 (65.9%)	157**			X	X
Ekpo et al., 2008	Nigeria	1 (33.3%)	-	2 (66.7%)	81***			X
Erhard et al., 2013	Uganda and Malawi	-	-	-				X
Ezeonu and Anyansi, 2010	Nigeria	-	9 (29%)	22 (71%)	90			X
Freeman et al., 2014	Kenya	-	-	-	67 before intervention; 49 after intervention **	63 before intervention; 48 after intervention**	71 before intervention; 52 after intervention**
Grant, Lloyd and Mensch, 2013	Malawi	-	-	59 (100%)				X	X
Grimes et al., 2017	Ethiopia	-	-	30 (100%)		109**	104**	X
Hassen and Abera, 2015	Ethiopia	-	-	2 (100%)	64**				X	X
Jahan et al., 2020	Bangladesh	-	-	-								X
Jordanova et al., 2015	Nicaragua	264 (64%)*	148 (36%)*	-	55			X	X
					30
					24
Karon et al., 2017	Indonesia	75 (100%)	0 (0%)	-				X	X		X		X
Korir, Okwara and Okumbe, 2018	Kenya	-	-	-				X	X		X	X
Lang, 2012	Ghana	-	-	-
Lopez-Quintero, Freeman and Neumark, 2009	Colombia	-	-	-	62**
Majra and Gur, 2010	India	-	-	-					X
Mathew et al., 2009	India	-	-		119**			X	X		X		X
					47**
					103**
Mbatha, 2011	Swaziland	-	-	2 (100%)	25			X
Miiro et al., 2018	Uganda	2 (50%)	-	2 (50%)								X
Mirassou-Wolf et al., 2017	Cambodia	8 (100%)	0 (0%)	-	108**			X	X		X
Mogaji et al., 2016	Nigeria	-	-	3 (100%)	148			X
					23
					71
Mohammed and Larsen-Reindor, 2020	Ghana	-	-	5 (100%)								X
Montgomery et al., 2016	Uganda	-	-	8 (100%)					X
Morgan et al., 2017	Ethiopia, Kenya, Mozambique, Rwanda, Uganda, and Zambia	1753 (77.3%)	516 (22.7%)	-
Mwanri, Worsley and Masika, 2000	Tanzania	-	1 (1.3%)	75 (98.7%)									X
Nazliansyah, Wichaikull and Wetasin, 2016	Indonesia	-	-	-
Ngwenya et al., 2018	Bostwana	3 (100%)	0 (0%)	-	39			X	X
					14
					8
Ofovwe and Ofili, 2009	Nigeria	53 (40%)	37 (27.7%)	43 (32.3%)
Parker et al., 2014	Uganda	-	-	-		70**		X	X
Rai et al., 2017	Nepal	35 (87.5%)	2 (5%)	3 (7.5%)				X	X		X		X
Saboori et al., 2011	Kenya	-	-	-
Sangalang et al., 2020	Philippines	13 (92.9%)*	1 (7.1%)*	-	302**			X
Shallo, Willi and Abubeker, 2020	Ethiopia	-	-	-				X			X
Shehmolo et al., 2021	Ethiopia	-	-	8 (100%)		49	63
Shrestha et al., 2017	Nepal	3 (18.8%)	-	13 (81.2%)				X	X
Sibiya and Gumbo, 2013	South Africa	2 (25%)	-	6 (75%)							X
Sommer et al., 2015	Ghana, Cambodia and Ethiopia	-	-	-				X	X		X	X
Sommer, 2013	Tanzania	-	-	32 (100%)		114			X	X
Uduku, 2015	Ghana and South Africa	3 (100%)	0 (0%)	-
Vally et al., 2019	Philippines	-	-	-			12**
							45**
Wichaidit et al., 2019	Kenya	-	-	-
Xuan et al., 2012	Vietnam	-	-	6 (100%)	67			X	X				X
					247
Zaunda et al., 2018	Malawi	-	-	10 (100%)				X			X
*The frequencies were not calculated based on the total number of schools, but rather on the number of schools that reply for the sanitation question on the survey. For more information see the papers.
** Average ratio
***Calculated considering the number of sanitation facilities and students informed by the authors
