# Supplementary material for: Water, Sanitation and Hygiene in Schools in Low- and Middle-Income Countries: A Systematic Review and Implications for the COVID-19 Pandemic
Source: Int J Environ Res Public Health. 2022 Mar 7;19(5):3124. doi: 10.3390/ijerph19053124 (PMC8910349; doi:10.3390/ijerph19053124)
Supplement: Supplementary file 1 [file ijerph-19-03124-s001.zip › Supplementary Material S6_Description of hygiene facilities in schools.xlsx]

## Sheet: S6
Authors	Country	Schools with presence of handwashing facilities (n/%)	Schools with water available for hanwashing (n/%)	Schools with presence of soap (n/%)	Schools with water avalable in the sanitation facilities (n/%)	Reported lack of handwashing facilities	Reported lack of water for handwashing	Reported lack of soap	Reported lack of water in the sanitation facilities	Reported lack of anal cleaning materials/self cleaning	Reported lack of cleaning materials
Agol and Harvey, 2018	Zambia	-	-	-	-	-	-	-	-	-	-
Ahmed et al., 2020	Pakistan	-	-	-	-	-	-	-	-	-	-
Alam et al., 2017	Bangladesh	-	-	63 (9%)	63 (9%)	-	-	X	X	-	-
Alexander et al., 2014	Kenya	47 (75.8%)	41 (66.1%)	1 (2%)	8 (12.9%)	X	X	X	-	-	X
Antwi-Agyei et al., 2017	Tanzania	37 (52.9%)	38 (54.3%)	25 (35.7%)	-	X	X	X	-	X	-
Aschale et al., 2021	Ethiopia	1 (20%)	-	-	-	X	-	-	-	-	-
Assefa and Kumie, 2014	Ethiopia	0 (0%)	-	-	-	X	-	-	-	X	-
Babalobi, 2013	Nigeria	-	-	-	-	-	-	-	-	-	-
Bergenfeld, Jackson and Yount, 2021	Nepal	-	-	99 (62.3%)	-	-	-	X	-	-	-
Boosey, Prestwich and Deave, 2014	Uganda	-	-	0 (0%)	0 (0%)	-	-	X	X	-	-
Bowen et al., 2007	China	-	-	16 (18.4%)	-	-	-	X	-	X	-
Bulto, 2021	Ethiopia	-	-	-	-	-	-	-	-	-	-
Chatterley, Liden and Javernick-Will, 2013	Belize	-	-	-	-	-	-	-	-	-	-
Chatterley et al.,2014	Bangladesh	-	-	7 (43.7%)	7 (43.7%)	-	-	X	X	-	-
Chinyama et al., 2019	Zambia	-	-	-	0 (0%)	-	-	X	X	-	X
Chung et al., 2009	Taiwan	-	-	-	-	-	-	-	-	-	-
Connoly and Sommer, 2013	Cambodia	-	-	-	0 (0%)	-	X	-	X	-	-
Crofts and Fisher, 2012	Uganda	-	-	-	1 (5.55%)	-	-	-	X	X	-
Cronk et al., 2021	Ethiopia, Ghana, Honduras, India, Kenya, Malawi, Mali, Mozambique, Niger, Rwanda, Tanzania, Uganda, Zambia, and Zimbabwe	715 (26.6%)*	715 (26.6%)*	325 (12.1%)*	-	X	X	X	-	-	-
Degefu Birhane,Serbessa and Degfie, 2019	Ethiopia	-	-	-	-	-	-	-	-	-	-
Devkota et al., 2020	Nepal	1 (100%) before and after intervention	1 (100%) before and after intervention	0 (0%) before intervention; 1 (100%) after intervention	1 (100%) before and after intervention	-	-	X	-	-	-
Dube and January, 2012	Zimbabwe	4 (100%)	-	0 (0%)	-	-	-	X	-	-	-
Ebong, 1994	Nigeria	-	-	-	-	-	-	-	-	-	-
Egbinola and Amanambu, 2015	Nigeria	10 (22.7%)	-	5 (11.4%)	-	X	-	X	-	X	-
Ekpo et al., 2008	Nigeria	0 (0%)*	-	0 (0%)*	-	X	-	X	-	-	-
Erhard et al., 2013	Uganda and Malawi	17 (70.8%)	-	-	-	X	-	-	-	-	-
Ezeonu and Anyansi, 2010	Nigeria	-	-	17 (54.8%)*	-	-	-	X	-	X	-
Freeman et al., 2014	Kenya	-	20 (10.8%) before intervention; 90 (48,6%) after intervention	-	-	-	X	X	-	-	-
Grant, Lloyd and Mensch, 2013	Malawi	-	-	-	-	-	-	-	-	-	-
Grimes et al., 2017	Ethiopia	1 (3.3%)*	1 (3.3%)*	-	-	-	X	-	-	-	-
Hassen and Abera, 2015	Ethiopia	0 (0%)	-	-	-	X	-	-	-	-	-
Jahan et al., 2020	Bangladesh	-	-	-	-	-	-	X	-	-	-
Jordanova et al., 2015	Nicaragua	88**(19%)	-	94**(26%)	-	X	-	X	-	X	-
Karon et al., 2017	Indonesia	51 (68%)	18 (24%)	18 (24%)	-	X	X	X	-	-	-
Korir, Okwara and Okumbe, 2018	Kenya	-	-	-	-	-	X	-	-	-	-
Lang, 2012	Ghana	-	-	1 (25%) before intervention; 4 (100%) after intervention	-	-	-	X	-	-	-
Lopez-Quintero, Freeman and Neumark, 2009	Colombia	-	-	-	-	-	X	X	-	X	-
Majra and Gur, 2010	India	-	-	2 (10%)	-	-	-	X	-	-	-
Mathew et al., 2009	India	290 (96.6%)	-	10 (3.3%)	-	X	-	X	-	-	-
Mbatha, 2011	Swaziland	-	-	-	-	-	-	-	-	-	-
Miiro et al., 2018	Uganda	-	-	0 (0%)	-	-	X	X	X	X	-
Mirassou-Wolf et al., 2017	Cambodia	4 (50%)	3 (37.5%)	1 (12.5%)	-	X	X	X	X	-	X
Mogaji et al., 2016	Nigeria	-	-	0 (0%)	-	-	-	X	-	-	-
Mohammed and Larsen-Reindor, 2020	Ghana	2 (40%)	-	0 (0%)	0 (0%)	X	-	X	X	-	-
Montgomery et al., 2016	Uganda	-	-	-	-	-	-	X	-	-	-
Morgan et al., 2017	Ethiopia, Kenya, Mozambique, Rwanda, Uganda, and Zambia	983 (44.5%)*	298 (13.5%)*	298 (13.5%)*	-	X	X	X	-	-	-
Mwanri, Worsley and Masika, 2000	Tanzania	-	-	-	-	-	-	-	-	-	-
Nazliansyah, Wichaikull and Wetasin, 2016	Indonesia	-	-	-	-	X	-	X	-	-	-
Ngwenya et al., 2018	Botswana	-	-	-	-	-	-	-	-	X	-
Ofovwe and Ofili, 2009	Nigeria	34 (25.6%)	-	-	-	X	-	-	-	-	-
Parker et al., 2014	Uganda	-	-	-	-	X	-	X	-	-	-
Rai et al., 2017	Nepal	14 (35%)	-	2 (5%)	14 (35%)	X	-	X	X	-	-
Saboori et al., 2011	Kenya	-	9 (16.4%)	1 (2%)	-	-	X	X	-	-	-
Sangalang et al., 2020	Philippines	12 (85.7%)	-	-	-	X	X	X	X	-	-
Shallo, Willi and Abubeker, 2020	Ethiopia	-	-	-	-	-	-	-	X	-	-
Shehmolo et al., 2021	Ethiopia	1 (12.5%)	-	-	0 (0%)	X	-	-	-	-	-
Shrestha et al., 2017	Nepal	0 (0%)	6 (35.5%)	0 (0%)	2 (12.5%)	X	X	X	X	X	X
Sibiya and Gumbo, 2013	South Africa	8 (100%)	-	0 (0%)	-	-	-	X	-	-	-
Sommer et al., 2015	Ghana, Cambodia and Ethiopia	-	-	-	-	-	-	-	X	-	-
Sommer, 2013	Tanzania	-	-	-	-	-	-	-	X	-	-
Uduku, 2015	Ghana and South Africa	-	-	-	-	-	-	-	-	-	-
Vally et al., 2019	Philippines	-	-	-	-	-	-	X	-	-	-
Wichaidit et al., 2019	Kenya	-	-	-	-	-	X	X	-	-	-
Xuan et al., 2012	Vietnam	-	-	0 (0%)	1 (16.7%)	-	-	X	X	X	-
Zaunda et al., 2018	Malawi	1 (10%)	-	0 (0%)	-	X	X	X	-	X	-
*The number might be underestimated due to one of the following reasons: i) The study used the JPM classification, therefore the quantity of schools with handwashing facilities, water for handwashing and soap is estimated; ii) The study informed presence or absence of handwashing facilities, water for handwashing and soap in only some of the schools assessed; iii)The study informed the presence o…
** The frequencies were not calculated based on the total number of schools, but rather on the number of schools that reply for the hygiene question on the survey. For more information see the papers.
