# Supplementary material for: Water, Sanitation and Hygiene in Schools in Low- and Middle-Income Countries: A Systematic Review and Implications for the COVID-19 Pandemic
Source: Int J Environ Res Public Health. 2022 Mar 7;19(5):3124. doi: 10.3390/ijerph19053124 (PMC8910349; doi:10.3390/ijerph19053124)
Supplement: Supplementary file 1 [file ijerph-19-03124-s001.zip › Supplementary Material S7_Description of menstrual hygiene management conditions in schools.xlsx]

## Sheet: S7
Authors	Country	Reported lack of sanitary materials	Reported lack of disposal facilities	Reported lack of room for changing/bathing/washing
Agol and Harvey, 2018	Zambia	-	-	-
Ahmed et al., 2020	Pakistan	-	-	-
Alam et al., 2017	Bangladesh	-	-	X
Alexander et al., 2014	Kenya	X	X	X
Antwi-Agyei et al., 2017	Tanzania	-	-	-
Aschale et al., 2021	Ethiopia	-	-	-
Assefa and Kumie, 2014	Ethiopia	-	-	-
Babalobi, 2013	Nigeria	-	-	-
Bergenfeld, Jackson and Yount, 2021	Nepal	-	-	X
Boosey, Prestwich and Deave, 2014	Uganda	X	X	X
Bowen et al., 2007	China	-	-	-
Bulto, 2021	Ethiopia	-	-	-
Chatterley, Liden and Javernick-Will, 2013	Belize	-	-	-
Chatterley et al.,2014	Bangladesh	-	-	-
Chinyama et al., 2019	Zambia	X	-	X
Chung et al., 2009	Taiwan	-	-	-
Connoly and Sommer, 2013	Cambodia	X	X	X
Crofts and Fisher, 2012	Uganda	-	X	-
Cronk et al., 2021	Ethiopia, Ghana, Honduras, India, Kenya, Malawi, Mali, Mozambique, Niger, Rwanda, Tanzania, Uganda, Zambia, and Zimbabwe. These	X	-	-
Degefu Birhane,Serbessa and Degfie, 2019	Ethiopia	-	-	-
Devkota et al., 2020	Nepal	-	-	-
Dube and January, 2012	Zimbabwe	-	X	-
Ebong, 1994	Nigeria	-	-	-
Egbinola and Amanambu, 2015	Nigeria	-	-	-
Ekpo et al., 2008	Nigeria	-	-	-
Erhard et al., 2013	Uganda and Malawi	-	-	-
Ezeonu and Anyansi, 2010	Nigeria	-	-	-
Freeman et al., 2014	Kenya	-	-	-
Grant, Lloyd and Mensch, 2013	Malawi	-	-	-
Grimes et al., 2017	Ethiopia	-	-	-
Hassen and Abera, 2015	Ethiopia	-	-	-
Jahan et al., 2020	Bangladesh	-	X	X
Jordanova et al., 2015	Nicaragua	-	-	-
Karon et al., 2017	Indonesia	-	-	-
Korir, Okwara and Okumbe, 2018	Kenya	X	X	X
Lang, 2012	Ghana	-	-	-
Lopez-Quintero, Freeman and Neumark, 2009	Colombia	-	-	-
Majra and Gur, 2010	India	-	-	-
Mathew et al., 2009	India	-	-	-
Mbatha, 2011	Swaziland	-	-	-
Miiro et al., 2018	Uganda	X	X	-
Mirassou-Wolf et al., 2017	Cambodia	-	-	-
Mogaji et al., 2016	Nigeria	-	-	-
Mohammed and Larsen-Reindor, 2020	Ghana	X	X	-
Montgomery et al., 2016	Uganda	-	-	X
Morgan et al., 2017	Ethiopia, Kenya, Mozambique, Rwanda, Uganda, and Zambia	-	X	-
Mwanri, Worsley and Masika, 2000	Tanzania	-	-	-
Nazliansyah, Wichaikull and Wetasin, 2016	Indonesia	-	-	-
Ngwenya et al., 2018	Botswana	-	-	-
Ofovwe and Ofili, 2009	Nigeria	-	-	-
Parker et al., 2014	Uganda	X	-	X
Rai et al., 2017	Nepal	-	-	-
Saboori et al., 2011	Kenya	-	-	-
Sangalang et al., 2020	Philippines	-	-	-
Shallo, Willi and Abubeker, 2020	Ethiopia	-	-	-
Shehmolo et al., 2021	Ethiopia	-	-	-
Shrestha et al., 2017	Nepal	-	-	-
Sibiya and Gumbo, 2013	South Africa	-	X	-
Sommer et al., 2015	Ghana, Cambodia and Ethiopia	X	-	X
Sommer, 2013	Tanzania	-	X	-
Uduku, 2015	Ghana and South Africa	-	-	-
Vally et al., 2019	Philippines	-	-	-
Wichaidit et al., 2019	Kenya	-	-	-
Xuan et al., 2012	Vietnam	-	-	-
Zaunda et al., 2018	Malawi	-	-	-
